# Supplementary material for: Development of a Chlamydomonas reinhardtii metabolic network dynamic model to describe distinct phenotypes occurring at different CO2 levels
Source: PeerJ journal article supplement (doi:10.7717/peerj.5528), 2018-09-03

A

## Canonical Discriminant Functions

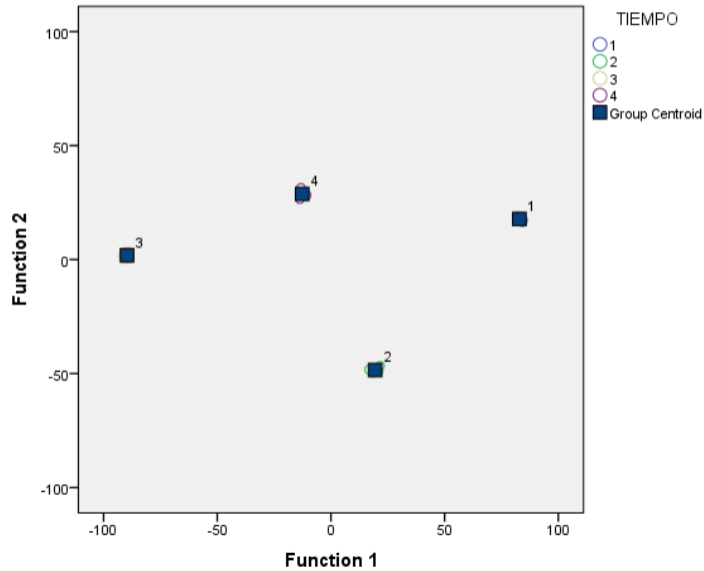

B

## Canonical Discriminant Functions

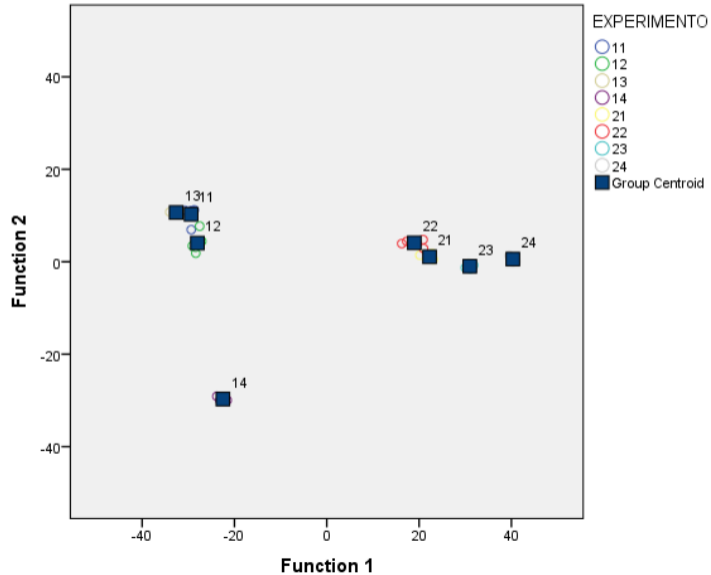

Supplement: Fig_S3.pdf [file Fig_S3.pdf]
