# Supplementary material for: Development of a Chlamydomonas reinhardtii metabolic network dynamic model to describe distinct phenotypes occurring at different CO2 levels
Source: PubMed Central journal article supplement (PMC6126472; doi:10.7717/peerj.5528), 2018-09-03

**A**

Canonical Discriminant Function 1

EXPERIMENTO = 1

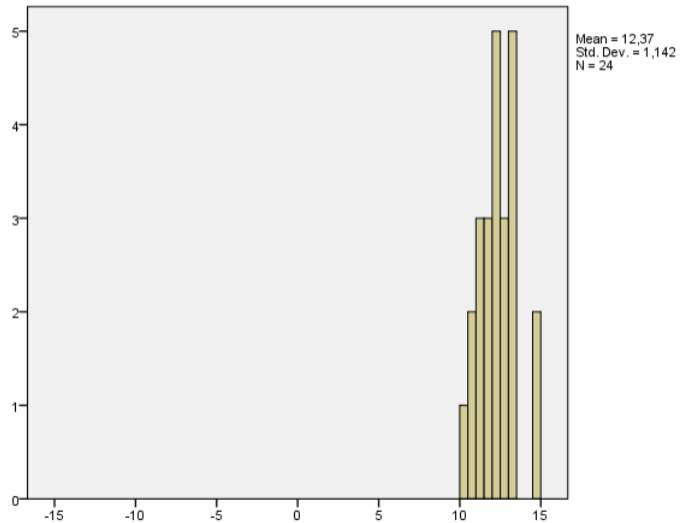**B**

Canonical Discriminant Function 1

EXPERIMENTO = 2

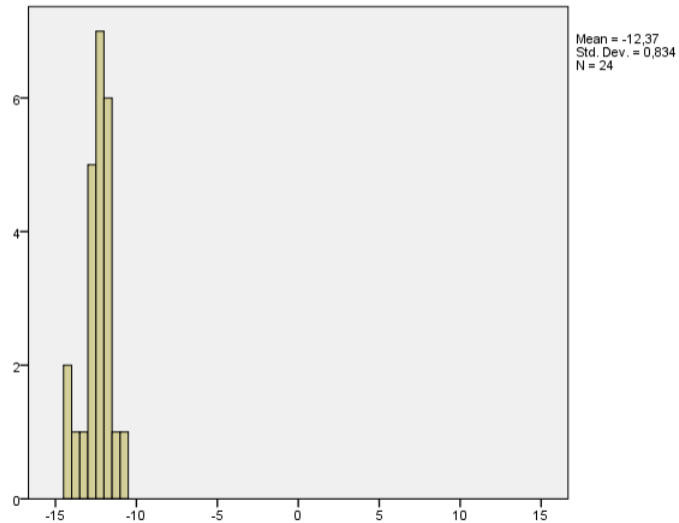

Supplement: peerj-06-5528-s002.pdf [file peerj-06-5528-s002.pdf]
